# Supplementary material for: Stereotactically-navigated percutaneous Irreversible Electroporation (IRE) compared to conventional IRE: a prospective trial
Source: PeerJ. 2016 Aug 11;4:e2277. doi: 10.7717/peerj.2277 (PMC4991851; doi:10.7717/peerj.2277)
Supplement: Data S1 [file peerj-04-2277-s001.xlsx]

## Sheet: Data
age	sex	procedure	tumor_type	tumor_location	long_axis	skin_to_tumor_depth	best_phase	tumor_density_native	liver_density_native	tumor_conspicuity_native	tumor_density_enhanced	liver_density_enhanced	tumor_conspicuity_enhanced	manual_or_navigated	total_needles	needle_depth	total_mas	total_dlp	planning_ctdi_vol	planning_dlp	verification_number_of	verification_ctdi_vol	verification_dlp	final_ctdi_vol	final_dlp	fluoro_ctdi_vol	fluoro_dlp	fluoro_slices	ablated_region_diameter	complete_ablation	safety_margin	complication	Sterile patient preparation Duration	Definition of targest points Duration	Number of Needles	Needle Placement Duration	needle_deviation_1	needle_deviation_2	needle_deviation_3	needle_deviation_4	needle_deviation_5	per_needle_duration	total_procedure_duration
81	male	IRE	hcc	VI	27	117	art	42	54	12	83	57	26	navigated	4	106	30977	3210	41	1433	1	14	335	15.19	376	0	0	0	23x21	complete	11	none	15	17	4	21	2.5	3.1	1.9			5.25	53
67	male	IRE	hcc	IV	42	53	pv	51	66	15	67	108	41	navigated	5	98	40477	4067	57.95	1736	2	40.8	784	19.5	377	90.26	162	28	45x33	complete	0	none	25	13	5	20	1.2	4	3.7	1.6		4	58
46	male	IRE	hcc	VIII	35	47	art	65	49	16	108	90	18	navigated	5	137	42707	4883	66.37	1701	3	52.5	1458	24.38	462	132.37	238	41	43x40	complete	5	none	17	11	5	36	0.7	2	2.5	2.4		7.2	64
74	male	IRE	hcc	III	13	57	art	38	59	21	81	58	23	navigated	4	75	33118	3542	39.1	1111	2	29.22	490	14.43	227	34.71	62	8	30x28	complete	10	none	19	18	4	34	1.3	2.1	1.8			8.5	71
64	male	IRE	hcc	VI	19	74	art	47	55	8	108	78	30	navigated	5	130	31178	3217	63.3	1683	2	38.17	762	18.39	435	46.11	83	11	33x33	complete	11	none	15	6	5	30	1.3	2.1	1.8	1.5		6	51
72	male	IRE	hcc	III	20	38	art	48	55	7	81	60	21	navigated	5	67	15673	1444	65.4	1742	2	31.4	646	15.6	321	0	0	0	60x48	complete	14	none	15	9	5	20	2.7	1.2	3.9	3.7		4	44
80	female	IRE	hcc	VI	29	54	art	37	52	15	91	58	33	navigated	5	48	35123	3747	44.2	1318	2	30.65	810	14.7	331	374.32	674	117	32x30	complete	10	none	15	9	5	20	1.4	1.8	1.7	1.4		4	44
81	male	IRE	hcc	VI	18	105	art	42	54	12	83	57	26	navigated	4	106	30977	3210	41	1433	1	14	335	15.19	376	0	0	0	23x21	complete	11	none	15	17	4	21	2.4	2.1	2.5			5.25	53
72	male	IRE	hcc	VII	29	68	art	46	65	19	64	98	34	navigated	5	112	37112	3845	42.49	1172	3	43.5	921	14.78	460	80.62	145	24	53x49	complete	10	none	10	12	5	26	1.6	3.8	3.7	0.6		5.2	48
53	male	IRE	hcc	V	18	64	art	44	47	3	95	56	39	navigated	4	87	40182	3938	61.31	1673	3	76.05	711	17.16	390	0	0	0	32x28	complete	8	none	15	11	4	40	2.6	2.5	3.4			10	66
72	male	IRE	hcc	VI	26	62	art	43	60	17	95	67	28	manual	5	98	35086	4029	48.95	1162	3	50.4	882	16.8	266	522.7	941	162	56x42	complete	8	none	23	0	5	56	2.9	2.2	3.4	5.6		11.2	79
77	male	IRE	crc	V	18	58	pv	59	59	0	82	136	54	manual	4	112	32549	3669	44	1150	2	36.8	417	15.2	389	936	1685	290	34x29	complete	0	none	19	0	4	83	3.2	2.3	2			20.75	102
67	male	IRE	hcc	VII	18	82	pv	18	38	20	46	86	40	manual	5	136	23641	3242	51.2	1346	3	41.5	1205	16.3	438	141.7	255	39	34x29	complete	14	none	17	0	5	87	3.6	2.8	4.6	3.4		17.4	104
54	male	IRE	crc	VIII	24	108	pv	31	53	22	94	108	14	manual	6	128	35250	3631	33.9	852	6	75.3	1678	12.48	277	446.4	804	107	30x29	complete	7	none	14	0	6	96	2.6	2.5	3.4	3.8	3.4	16	110
55	male	IRE	crc	VIII	27	116	pv	31	44	13	52	96	44	manual	6	193	49628	5500	46.48	1191	5	115.41	1816	16.18	354	1386.92	2497	317	33x32	complete	7	none	13	0	6	140	2.9	2.2	3.4	5.6	5.2	23.3333	153
62	male	IRE	hcc	Iva	32	40	art	39	50	11	92	65	27	manual	4	75	30737	4547	50.28	1760	3	47.57	1695	15.6	463	338.6	610	92	51x40	complete	8	none	18	0	4	82	3.1	2.4	1.9			20.5	100
61	male	IRE	hcc	VIII	27	107	art	37	35	2	89	53	36	manual	4	138	37255	4497	61.1	1588	3	63.97	1478	23.4	450	313.8	565	86	44x40	complete	6	none	16	0	4	48	3.6	2.8	4.6			12	64
73	female	IRE	crc	VIII	18	80	pv	57	44	13	48	107	59	manual	6	136	70605	8646	39.4	1178	8	73.32	1695	7.8	90	2123	5463	678	55x49	complete	6	none	17	0	6	108	3.8	0.8	1.9	5	6.2	18	125
54	male	IRE	hcc	I	20	97	art	43	48	5	99	65	34	manual	3	121	33554	3787	37.65	982	3	49.52	886	15.6	405	697.71	1256	184	41x31	complete	6	none	18	0	3	52	2.7	2.4				17.3333	70
57	male	IRE	hcc	V	44	48	art	61	58	3	82	62	20	manual	5	138	69558	7315	59.3	1486	5	110.6	1755	18.9	424	1652.9	2975	362	49x41	complete	4	none	16	0	5	118	1.4	3.1	4.1	3.9		23.6	134
